# Supplementary material for: Inhibitory Effects of Hydroethanolic Leaf Extracts of Kalanchoe brasiliensis and Kalanchoe pinnata (Crassulaceae) against Local Effects Induced by Bothrops jararaca Snake Venom
Source: PubMed Central journal article supplement (PMC5199091; doi:10.1371/journal.pone.0168658), 2016-12-29
Supplement: pone.0168658.s003.pdf [file pone.0168658.s003.pdf]

**S1 Table. Compounds identified by HPLC-DAD-MS in HE extract of the leaves of *Kalanchoe brasiliensis* species.**

| Peak           | TR (min) | MS( <i>m/z</i> )*                                                                                                                                  | MS <sup>2</sup> ( <i>m/z</i> )*                                          | MS <sup>3</sup> ( <i>m/z</i> )*                                                                                                                         | UV max (nm) | Compound                                                           |
|----------------|----------|----------------------------------------------------------------------------------------------------------------------------------------------------|--------------------------------------------------------------------------|---------------------------------------------------------------------------------------------------------------------------------------------------------|-------------|--------------------------------------------------------------------|
| 1              | 15.3     | [M+H] <sup>+</sup> 787(3)<br>[MH-(deoxy-hexose)] <sup>+</sup> 641(17)<br>[MH-(2deoxy-hexoses)] 495(2)<br>[aglicon] <sup>+</sup> 333(4)             | 787→641(32);<br>495(78);<br>333(100).                                    | 333→ 318(100); 301(100);<br>290(38); 272(32); 245(15);<br>216(6,3); 186(12); 169(79);<br>142(23); 111(4,8).                                             | 268, 340.   | Patuletin- <i>O</i> -hexoside-<br>di- <i>O</i> -deoxy-hexoside     |
| 2              | 18.3     | [M+H] <sup>+</sup> 787(15)<br>[MH-(deoxy-hexose)] <sup>+</sup> 641(27)<br>[MH-(deoxy-hexose)] <sup>+</sup> 495(9)<br>[aglicon] <sup>+</sup> 333(1) | 787→641(30);<br>605(1,2);<br>495(33);<br>479(9);<br>333(100);<br>318(5). | 333→ 318(100); 301(100);<br>290(38); 272(32); 245(15);<br>216(6,3); 186(12); 169(79);<br>142(23); 111(4,8).                                             | 268, 350.   | Patuletin- <i>O</i> -hexoside-<br>di- <i>O</i> -deoxy-hexoside     |
| 3              | 19.1     | [M+H] <sup>+</sup> 771(6.8)<br>[MH-(deoxy-hexose)] <sup>+</sup> 625(44.6)<br>[MH-(2deoxy-hexoses)] 479(4,22)<br>[aglicon] <sup>+</sup> 317(3.5)    | 771→625(49.6);<br>479(100);<br>317(55.6);<br>302(9.8).                   | 317→302(100); 285(100);<br>274(43.6); 273(50.4);<br>257(24.9); 256(48);<br>228(71.7); 214(21.9);<br>203(20); 168(41.2); 142(28);<br>134(31); 107(18.5). | 268, 314.   | Eupafolin- <i>O</i> -<br>hexoside-di- <i>O</i> -deoxy-<br>hexoside |
| 4              | 19.7     | [M+H] <sup>+</sup> 641(35,7)<br>[MH-(hexose)] <sup>+</sup> 479(3)<br>[aglicon] <sup>+</sup> 333(0.2)                                               | 641→ 495(6,6);<br>479(78);<br>333(100);<br>318(3.7).                     | 333→318(100); 301(100);<br>290(38); 272(32); 245(15);<br>216(6.3); 186(12); 169(79);<br>142(23); 111(4.8).                                              | 268, 359.   | Patuletin- <i>O</i> -hexoside-<br><i>O</i> -deoxy-hexoside         |
| 5              | 20.3     | [M+H] <sup>+</sup> 787(100)<br>[MH-(deoxy-hexose)] <sup>+</sup> 641(23.5)<br>[MH-(2deoxy-hexoses)] 495(11,7)<br>[aglicon] <sup>+</sup> 333(2.1)    | 787→641(83.8);<br>495(100);<br>333(87.4).                                | 333→ 318(100); 301(100);<br>169(51.85).                                                                                                                 | 268, 350.   | Patuletin- <i>O</i> -hexoside-<br>di- <i>O</i> -deoxy-hexoside     |
| 6 <sup>#</sup> | 23.3     | [M+H] <sup>+</sup> 625(92)<br>[MH-(hexose)] <sup>+</sup> 463(23.5)                                                                                 | 625→463(84);<br>317(100).                                                | 317→ 302(100); 285(100);<br>274(26.5); 266(13.8);<br>257(13); 255(24.6); 246(26);<br>232(30.4); 228(100);<br>218(12); 107(29).                          | 268, 340.   | Eupafolin- <i>O</i> -<br>hexoside- <i>O</i> -deoxy-<br>hexoside    |
| 7 <sup>#</sup> | 24.7     | [M+H] <sup>+</sup> 625(73)<br>[MH-(deoxy-hexose)] <sup>+</sup> 479(32)<br>[MH-(2deoxy-hexose)] 333(9.5)                                            | 625→ 479(57.5);<br>333(31.6);<br>317(100)                                | 333→318(100); 301(100);<br>290(38); 272(32); 245(15);                                                                                                   | 259, 354.   | Patuletin-di- <i>O</i> -deoxy-<br>hexoside                         |

|                       |      |                                                                                                                                                                                                   |                                                                                               |                                                                                                                                            |           |                                                                                                      |
|-----------------------|------|---------------------------------------------------------------------------------------------------------------------------------------------------------------------------------------------------|-----------------------------------------------------------------------------------------------|--------------------------------------------------------------------------------------------------------------------------------------------|-----------|------------------------------------------------------------------------------------------------------|
|                       |      |                                                                                                                                                                                                   |                                                                                               | 216(6,3); 186(12); 169(79);<br>142(23); 111(4.8).                                                                                          |           |                                                                                                      |
| <b>8<sup>#</sup></b>  | 25.4 | [M+H] <sup>+</sup> 787(2)<br>[MH-(deoxy-hexose)] <sup>+</sup> 641(100)<br>[MH-(2deoxy-hexose)] <sup>+</sup> 495(19,2)<br>[aglicon] <sup>+</sup> 333(3)                                            | 787→ 641(66.8);<br>495(100);<br>479(19.9);<br>333(74.2).                                      | 333→318(100); 301(90);<br>290(41.5); 272(71.4);<br>263(13.5); 244(38.0);<br>227(15); 169(100);<br>168(91.8); 142(33.5).                    | 268, 350. | Patuletin- <i>O</i> -hexoside-<br>di- <i>O</i> -deoxy-hexoside                                       |
| <b>9</b>              | 26.1 | [M+H] <sup>+</sup> 611(100)<br>[MH- (deoxy-hexose)] <sup>+</sup> 465(18.6)<br>[aglicon] <sup>+</sup> 303(3)                                                                                       | 611→465(58.7);<br>449(32);<br>303(100).                                                       | 303→ 285(49.5); 261(1.3);<br>257(100); 247(26.6);<br>229(43); 165(45); 153(8);<br>137(4.5), 121(6.2); 111(4.8).                            | 268, 340. | Quercetin- <i>O</i> -<br>hexoside- <i>O</i> -deoxy-<br>hexoside                                      |
| <b>10</b>             | 27.4 | [M+H] <sup>+</sup> 829(100)<br>[MH-(deoxy-hexose)] <sup>+</sup> 683(23.5)<br>[MH-(acetyl-deoxy-hexose)] <sup>+</sup> 641(12)<br>[MH-346] <sup>+</sup> 483(69.1)<br>[MH-362] <sup>+</sup> 467(6.7) | 829→811(11.1);<br>683(30.5);<br>667(4.6)<br>641(43.4);<br>495(100);<br>479(12.6);<br>333(85). | 333→ 318(100); 301(100);<br>290(38); 272(32); 245(15);<br>216(6.3); 186(12); 169(79);<br>142(23); 111(4.8).                                | 268, 350. | Patuletin- <i>O</i> -hexoside-<br><i>O</i> -acetyl- deoxy-<br>hexoside- <i>O</i> -deoxy-<br>hexoside |
| <b>11<sup>#</sup></b> | 29.6 | [M+H] <sup>+</sup> 609(100)<br>[MH-(deoxy-hexose)] <sup>+</sup> 463(26)<br>[aglicon] <sup>+</sup> 317(7.3)<br>[MH-306] <sup>+</sup> 303(17.9)                                                     | 609→ 463(100);<br>317(69.5).                                                                  | 317→ 302(100); 285(100);<br>274(35); 273(39,7);<br>266(13.8); 257(13);<br>255(24.6); 246(26);<br>232(30.4); 228(100);<br>218(12); 107(29). | 268, 350. | Eupafolin-di- <i>O</i> -<br>deoxy-hexoside                                                           |
| <b>12<sup>#</sup></b> | 31.7 | [M+H] <sup>+</sup> 829(38,2)<br>[MH-(deoxy-hexose)] <sup>+</sup> 683(11.6)                                                                                                                        | 829→683(49);<br>641(35.7);<br>495(100);<br>333(82.3).                                         | 333→ 318(100); 301(100);<br>290(38); 272(32); 245(15);<br>216(6.3); 186(12); 169(79);<br>142(23); 111(4.8).                                | 312.      | Patuletin- <i>O</i> -hexoside-<br><i>O</i> -acetyl- deoxy-<br>hexoside- <i>O</i> -deoxy-<br>hexoside |
| <b>13<sup>#</sup></b> | -    | -                                                                                                                                                                                                 | -                                                                                             | -                                                                                                                                          | -         | Compound not<br>didentifie                                                                           |
| <b>14<sup>#</sup></b> | 35.1 | [2M+Na] <sup>+</sup> 979(4,2)<br>[M+H] <sup>+</sup> 479(77)<br>[MH-(deoxy-hexose)] <sup>+</sup> 333(100)                                                                                          | 479→333(100)                                                                                  | 333→318(100); 301(98);<br>290(29.4); 272(15.5);<br>244(13); 186(8); 169(100);<br>142(8).                                                   | 268. 330. | Patuletin- <i>O</i> -deoxy-<br>hexoside                                                              |

|                       |      |                                                                                                                    |                                          |                                                                                                                                                         |           |                                                                      |
|-----------------------|------|--------------------------------------------------------------------------------------------------------------------|------------------------------------------|---------------------------------------------------------------------------------------------------------------------------------------------------------|-----------|----------------------------------------------------------------------|
| <b>15<sup>#</sup></b> | 36.5 | [M+H] <sup>+</sup> 667(100)<br>[MH-(deoxy-hexose)] <sup>+</sup> 521(40)<br>[aglicon] <sup>+</sup> 333(6)           | 667→521(100);<br>479(3.6);<br>333(33.5). | 333→318(100); 301(95.7);<br>289(100);244(47.3);<br>202(21.2); 186(59.2);<br>169(19); 142(27.7);<br>123(29.4).                                           | 268, 350. | Patuletin- <i>O</i> -deoxy-hexoside- <i>O</i> -acetyl-deoxy-hexoside |
| <b>16<sup>#</sup></b> | 38.3 | [M+H] <sup>+</sup> 667(100)<br>[MH-(acetyldeoxy-hexose)] <sup>+</sup> 479(40)<br>[aglicon] <sup>+</sup> 333(4,7)   | 667→521(6.7);<br>479(61.3);<br>333(100). | 333→318(100); 301(100);<br>290(38.7); 289(43.7);<br>272(49.4); 244(25.4);<br>234(12.8);186(13.4);<br>169(83.1); 142(22.8).                              | 268, 350. | Patuletin- <i>O</i> -deoxy-hexoside- <i>O</i> -acetyl-deoxy-hexoside |
| <b>17<sup>#</sup></b> | 39.3 | [M+H] <sup>+</sup> 667(100)<br>[MH-(deoxy-hexose)] <sup>+</sup> 521(46)<br>[aglicon] <sup>+</sup> 333(4.4)         | 667→521(100);<br>479(3.5);<br>333(59).   | 333→318(100); 301(100);<br>290(19.2); 289(20.9);<br>273(22.4); 272(16.2);<br>245(16); 244(16.3); 186(16);<br>169(52.7); 151(13.6);<br>142(13.6).        | 268, 350. | Patuletin- <i>O</i> -deoxy-hexoside- <i>O</i> -acetyl-rhamnoside     |
| <b>18</b>             | 42.7 | [M+H] <sup>+</sup> 651(100)<br>[MH-(desóxi-hexose)] <sup>+</sup> 505(29.5)<br>[aglicon] <sup>+</sup> 317(7.2)      | 651→505(100);<br>463(5); 317(42)         | 317→302(100); 285(100);<br>274(43.6); 273(50.4);<br>257(24.9); 256(48);<br>228(71.7); 214(21.9);<br>203(20); 168(41.2); 142(28);<br>134(31); 107(18.5). | 268, 350. | Eupafolin- <i>O</i> -deoxy-hexoside- <i>O</i> -acetyl-deoxy-hexoside |
| <b>19</b>             | 46.3 | [M+H] <sup>+</sup> 651(100)<br>[MH-(acetyl-deoxy-hexose)] <sup>+</sup> 463(4.8)<br>[aglicon] <sup>+</sup> 317(4.4) | 651→505(100);<br>463(3.7);<br>317(29.2). | 317→302(100); 285(100);<br>274(43.6); 273(50.4);<br>257(24.9); 256(48);<br>228(71.7); 214(21.9);<br>203(20); 168(41.2); 142(28);<br>134(31); 107(18.5). | 269, 350. | Eupafolin- <i>O</i> -rhamnoside- <i>O</i> -acetyl-rhamnoside         |
| <b>20</b>             | 47.1 | [M+H] <sup>+</sup> 667(100)<br>[MH-(deoxy-hexose)] <sup>+</sup> 521(29)<br>[aglicon] <sup>+</sup> 333(78)          | 667→521(100);<br>479(2.5);<br>333(78).   | 333→318(100); 301(100);<br>290(30.9); 289(11.9);<br>262(26); 244(31.2);<br>169(42.3).                                                                   | 269, 350. | Patuletin- <i>O</i> -deoxy-hexoside- <i>O</i> -acetyl-deoxy-hexoside |
| <b>21</b>             | 50.6 | [M+H] <sup>+</sup> 709(100)<br>[MH-(acetyl-deoxy-hexose)] <sup>+</sup> 521(4.2)<br>[MH-226] <sup>+</sup> 483(2.7)  | 709→521(100);<br>333(48).                | 333→318(100); 301(100);<br>290(30.9); 289(11.9);                                                                                                        | 269, 355. | Patuletin-di- <i>O</i> -acetyl-deoxy-hexoside                        |

|                       |      |                                                                                                                                                                           |                                                 |                                                                                                            |                |                                                                                             |
|-----------------------|------|---------------------------------------------------------------------------------------------------------------------------------------------------------------------------|-------------------------------------------------|------------------------------------------------------------------------------------------------------------|----------------|---------------------------------------------------------------------------------------------|
|                       |      | [MH-242] <sup>+</sup> 467(1.4)                                                                                                                                            |                                                 | 262(26); 244(31.2);<br>169(42.3).                                                                          |                |                                                                                             |
| <b>22<sup>#</sup></b> | 53.9 | [M+H] <sup>+</sup> 709(100)<br>[MH-(acetyl-deoxy-hexose)] <sup>+</sup> 521(9)                                                                                             | 709→521(100);<br>333(79.4).                     | 333→318(100); 301(100);<br>290(38); 272(32); 245(15);<br>216(6.3); 186(12); 169(79);<br>142(23); 111(4.8). | 269, 355.      | Patuletin-di- <i>O</i> -acetyl-<br>deoxy-hexoside                                           |
| <b>23<sup>#</sup></b> | 58.0 | [M+H] <sup>+</sup> 709(100)<br>[MH-(acetyl-deoxy-hexose)] <sup>+</sup> 521(10)                                                                                            | 709→521(100);<br>333(85.8).                     | 333→318(100); 301(83.9);<br>290(78.6); 289(18.5);<br>272(19.5); 1699(100);<br>151(32).                     | 269, 355.      | Patuletin-di- <i>O</i> -acetyl-<br>deoxy-hexoside                                           |
| <b>24</b>             | 63.1 | [M+H] <sup>+</sup> 709(100)<br>[MH-(acetyl-deoxy-hexose)] <sup>+</sup> 521(5,4)<br>[aglicon] <sup>+</sup> 333(4.8)                                                        | 709→521(100);<br>506(7.6);<br>412(6);333(83.3). | 333→318(100); 301(83.9);<br>290(78.6); 289(18.5);<br>272(19.5); 169(100);<br>151(32).                      | 269, 355.      | Patuletin-di- <i>O</i> -acetyl-<br>deoxy-hexoside                                           |
| <b>25</b>             | 63.3 | [M+H] <sup>+</sup> 693(100)<br>[MH-(acetyl- deoxy-hexose)] <sup>+</sup> 505(6)                                                                                            | 693→505(100);<br>317(66.7).                     | 317→302(100).                                                                                              | 269, 355.      | Eupafolin-di- <i>O</i> -<br>acetyl- deoxy-<br>hexoside                                      |
| <b>26</b>             | 65.3 | [M+H] <sup>+</sup> 693(100)<br>[MH-(acetyl-deoxy-hexose)] <sup>+</sup> 505(6)                                                                                             | 693→505(100);<br>317(74.9).                     | 317→302(100).                                                                                              | 267, 317, 355. | Eupafolin-di- <i>O</i> -<br>acetyl-deoxy-hexoside                                           |
| <b>27</b>             | 65.7 | [M+H] <sup>+</sup> 693(100)<br>[MH-(acetyl-deoxy-hexose)] <sup>+</sup> 505(7)                                                                                             | 693→547(14,8);<br>505(75.8);<br>317(100).       | 317→302(100).                                                                                              | 267, 317, 355. | Eupafolin-di- <i>O</i> -<br>acetyl-deoxy-hexoside                                           |
| <b>28</b>             | 66.2 | [M+H] <sup>+</sup> 751(100)<br>[MH-(acetyl-deoxy-hexose)] <sup>+</sup> 563(12,5)<br>[MH-di-acetyl-deoxy-hexose] <sup>+</sup> 521(7,5)<br>[aglicon] <sup>+</sup> 333(70,5) | 751→563(100);<br>521(7.5);<br>333(70.5).        | 333→318(100); 301(100);<br>290(38); 272(32); 245(15);<br>216(.,3); 186(12); 169(79);<br>142(23); 111(4.8). | 268, 350.      | Patuletin- <i>O</i> -acetyl-<br>deoxy-hexoside- <i>O</i> -di-<br>acetyl-deoxy-<br>hexoside. |

RT, retention time. \*, The intensity of each peak as a percentage, is provided adjacent to m/z ration of the same. #, Major peak.
