# Supplementary material for: Inhibitory Effects of Hydroethanolic Leaf Extracts of Kalanchoe brasiliensis and Kalanchoe pinnata (Crassulaceae) against Local Effects Induced by Bothrops jararaca Snake Venom
Source: PubMed Central journal article supplement (PMC5199091; doi:10.1371/journal.pone.0168658), 2016-12-29
Supplement: pone.0168658.s004.pdf [file pone.0168658.s004.pdf]

**S2 Table. Compounds identified by HPLC-DAD-MS in HE extract of the leaves of *Kalanchoe pinnata* species.**

| Peak           | TR (min) | MS ( <i>m/z</i> )                                                                                                                           | MS <sup>2</sup> ( <i>m/z</i> )                                  | MS <sup>3</sup> ( <i>m/z</i> )                                                                                                                     | UV max (nm) | Compound                                                |
|----------------|----------|---------------------------------------------------------------------------------------------------------------------------------------------|-----------------------------------------------------------------|----------------------------------------------------------------------------------------------------------------------------------------------------|-------------|---------------------------------------------------------|
| 1              | 7.2      | [M-H] <sup>-</sup> 353 (18)<br>[M-CAF] <sup>-</sup> 191 (100)<br>[M-CAF-H <sub>2</sub> O] <sup>-</sup> 173 (71.7)                           | 353→ 173 (100); 111 (18.7).                                     | —————                                                                                                                                              | —————       | 3- <i>O</i> -caffeoylquinic Acid                        |
| 2              | 8.7      | [M-H] <sup>-</sup> 353 (2.6)<br>[M-CAF] <sup>-</sup> 191 (100)<br>[M-CAF-H <sub>2</sub> O] <sup>-</sup> 173 (46.7)                          | 353→ 173(100); 111(17.5).                                       | —————                                                                                                                                              | —————       | 5- <i>O</i> -caffeoylquinic Acid                        |
| 3              | 9.1      | [M-H] <sup>-</sup> 353 (1)<br>[M-CAF] <sup>-</sup> 191 (100)<br>[M-CAF-H <sub>2</sub> O] <sup>-</sup> 173 (18.7)                            | 353→ 173(100); 111(18).                                         | —————                                                                                                                                              | —————       | 4- <i>O</i> -caffeoylquinic Acid                        |
| 4 <sup>#</sup> | 16.8     | [M+H] <sup>+</sup> 611 (100)<br>[MH-(deoxy-hexose)] <sup>+</sup> 465 (35)<br>[MH-272] <sup>+</sup> 339(24)<br>[MH-464] <sup>+</sup> 147(21) | 611→ 465(100); 303(28).                                         | 303→ 285(62.9); 275(15.4); 257(100); 247(34.7); 229 (47.8); 213(6,2); 195 (7.7); 183 (10); 165 (71.2); 153 (14.4); 137 (17,2); 121 (5.6); 11 (6.4) | 312         | Quercetin- <i>O</i> -deoxy-hexoside- <i>O</i> -hexoside |
| 5              | 24.5     | [M+H] <sup>+</sup> 597(10.8)<br>[MH-132] <sup>+</sup> 465(50.7)<br>[MH-278] <sup>+</sup> 319(50.7)                                          | 597→ 465 (100); 447 (16.7); 429 (18.5); 361 (13.5); 319 (63.5). | 319→ 301 (96.6); 283(18.13); 273(100); 263(9.4); 245 (9.3); 207 (4.4); 195 (16.1); 165 (36.3); 153 (12.8); 127 (5.31).                             | 275, 370sh. |                                                         |

|          |      |                                                                                                                                                   |                                                            |                                                                                                                                 |                |                                                           |
|----------|------|---------------------------------------------------------------------------------------------------------------------------------------------------|------------------------------------------------------------|---------------------------------------------------------------------------------------------------------------------------------|----------------|-----------------------------------------------------------|
|          |      | [MH-430] <sup>+</sup> 181(24.8)<br>[MH-512] <sup>+</sup> 99(10.6)                                                                                 |                                                            |                                                                                                                                 |                |                                                           |
| <b>6</b> | 29.8 | [M+H] <sup>+</sup> 641 (100)<br>[MH-(deoxy-hexose)] <sup>+</sup> 495 (43.7)<br>[MH-272] <sup>+</sup> 339(32)<br>[aglycone] <sup>+</sup> 303(10.8) | 641→ 495(100);<br>479(12.2) 333(64).                       | 333→318(100); 301(100); 290 (38); 272 (32); 245 (15); 216 (6.3); 186 (12); 169 (79); 142 (23); 111 (4.8).                       | 269, 320, 360. | Patuletin- <i>O</i> -deoxy-hexoside- <i>O</i> -hexoside.  |
| <b>7</b> | 30.7 | [M+H] <sup>+</sup> 597(100)<br>[MH-132] <sup>+</sup> 465 (13.3)<br>[MH-278] <sup>+</sup> 319 (83.4)                                               | 597→ 465(100);<br>447(11); 429(10);<br>361(6); 319(32).    | 319→301 (96.6); 283 (18.13);<br>273(100); 263(9.4); 245 (9.3); 207 (4.4); 195(16.1); 165(36.3);<br>153(12.8); 127 (5.31).       | 269,350.       |                                                           |
| <b>8</b> | 32.7 | [M+H] <sup>+</sup> 465(70,9)<br>[MH-(hexose)] <sup>+</sup> 303(68)                                                                                | 465→ 303(100).                                             | 303→ 285 (66.5); 275 (20.5);<br>257(100); 247(38.6); 229(87,8);<br>165(55.4); 153 (22.8); 137 (12.34);<br>121 (5.2); 111 (5.6). | 269, 350.      | Quercetin- <i>O</i> -hexoside                             |
|          |      | [M+H] <sup>+</sup> 595 (18,4)<br>[MH-(deoxy-hexose)] <sup>+</sup> 449 (100)                                                                       | 449→287(100)                                               | 287→ -----                                                                                                                      |                | Kaempferol- <i>O</i> -deoxy-hexoside- <i>O</i> -hexoside. |
| <b>9</b> | 36.4 | [M+H] <sup>+</sup> 611 (18,4)<br>[MH-(pentose)] <sup>+</sup> 479 (5,4)                                                                            | 611→ 479(39.6); 461 (13); 443 (21.3); 375 (8.7); 333(100). | 333→ -----                                                                                                                      | 269, 355.      | Patuletin- <i>O</i> -deoxy-hexoside- <i>O</i> -pentoside  |

|                       |      |                                                                                                                                             |                                                                 |                                                                                                                                                |           |                                                                  |
|-----------------------|------|---------------------------------------------------------------------------------------------------------------------------------------------|-----------------------------------------------------------------|------------------------------------------------------------------------------------------------------------------------------------------------|-----------|------------------------------------------------------------------|
|                       |      | [MH-278] <sup>+</sup> 333 (100)                                                                                                             |                                                                 |                                                                                                                                                |           |                                                                  |
| <b>10</b>             | 37.0 | [M+H] <sup>+</sup> 463(100)<br>[MH-130] <sup>+</sup> 333(3)                                                                                 | 463→ 287 (100)                                                  | 287→ -----                                                                                                                                     | 268, 355. | Kaempferol                                                       |
| <b>11<sup>#</sup></b> | 37.8 | [M+H] <sup>+</sup> 581 (100)<br>[M-(pentose)] <sup>+</sup> 449 (7,8)<br>[aglicona] <sup>+</sup> 303 (77)                                    | 581→ 449(100);<br>431(10,5); 413(15,8);<br>345(6,5); 303(44,3). | 303→ 285(42,7); 275(13,3);<br>274(8,7); 257(100); 247(25,2);<br>229(48,8); 165(59,4); 153(12,4);<br>149(9,1); 137(8,7); 121(10);<br>111(10,3). | 255, 348  | Quercetin- <i>O</i> -deoxy-<br>hexoside- <i>O</i> -<br>pentoside |
| <b>12<sup>#</sup></b> | 39.3 | [M+H] <sup>+</sup> 581 (75)<br>[M-(pentose)] <sup>+</sup> 449 (23,5)<br>[MH-241] <sup>+</sup> 340 (18)<br>[aglycone] <sup>+</sup> 303 (100) | 581→ 449 (91.8); 345<br>(5.2); 303(100).                        | 303→ 285(42.7); 275 (13.3); 274<br>(8.7); 257(100); 247(25.2);<br>229(48.8); 165(59.4); 153 (12.4);<br>149 (9.1); 137(8.7); 121(10); 111.      | 269, 350  | Quercetin- <i>O</i> -deoxy-<br>hexoside- <i>O</i> -<br>pentoside |
| <b>13<sup>#</sup></b> | 39.6 | [M+H] <sup>+</sup> 581 (14,4)<br>[M-(pentose)] <sup>+</sup> 449(35.7)<br>[aglycone] <sup>+</sup> 303(100)                                   | 581→ 449(100);<br>431(9.7); 413 (19.3);<br>345 (10.5); 303(48)  | 303→ 285(49.4); 274 (17); 257<br>(100); 247 (33.6); 229 (69); 165<br>(45.7); 153 (20.9); 137 (15); 121<br>(8.3).                               | 269, 350  | Quercetin- <i>O</i> -deoxy-<br>hexoside- <i>O</i> -<br>pentoside |
| <b>14</b>             | 40.6 | [M+H] <sup>+</sup> 609(100)<br>[aglycone] <sup>+</sup> 303(6)                                                                               | 609→ 477 (41.6);<br>301(100).                                   | 301→                                                                                                                                           | 269, 350. |                                                                  |
| <b>15</b>             | 43.3 | [M+H] <sup>+</sup> 493(100)<br>[M-hexose] <sup>+</sup> 331(4)                                                                               | 493→ 331(100).                                                  | 331→                                                                                                                                           | 269, 350. |                                                                  |

|           |      |                                                                                                      |                                                  |                                                                                                                    |           |                                                           |
|-----------|------|------------------------------------------------------------------------------------------------------|--------------------------------------------------|--------------------------------------------------------------------------------------------------------------------|-----------|-----------------------------------------------------------|
| <b>16</b> | 44.8 | [M+H] <sup>+</sup> 565(100)<br>[aglycone] <sup>+</sup> 287 (72.7)                                    | 565→ 433 (100); 397 (16.7); 329 (4.4);287(35.3). | 287→ 269 (13); 241(78.4); 231(15.7); 213(71); 203 (18.3); 183 (34); 165 (100); 153 (18.2); 133 (21.5); 121 (26.4). | 264, 355. | Kaempferol- <i>O</i> -deoxy-hexoside- <i>O</i> -pentoside |
| <b>17</b> | 45.4 | [M+H] <sup>+</sup> 595(100)<br>[MH-122] <sup>+</sup> 473 (33.2)<br>[aglycone] <sup>+</sup> 317(84,7) | 595→ 463 (100); 427 (21); 383 (5.8); 317 (67.2)  | 317→ 302(100); 285 (39.4); 274 (5.7); 271(11.6); 257 (10.5); 261 (9.3); 243(5); 165 (8.7); 153 (5.3); 139 (14.7).  | 266, 350. | Eupafolin- <i>O</i> -deoxy-hexoside- <i>O</i> -pentoside  |
| <b>18</b> | 47.0 | [M+H] <sup>+</sup> 477(100)                                                                          | 477→ 301(100)                                    | 301→ 286(100); 283 (8.5); 273 (17.9); 245(7.4); 205(8.2).                                                          | 269, 350. |                                                           |
| <b>19</b> | 49.0 | [M+H] <sup>+</sup> 507(100)                                                                          | 507→ 331(100)                                    | 331→316(100).                                                                                                      | 269, 355. |                                                           |

RT, retention time. \*, The intensity of each peak as a percentage, is provided adjacent to m/z ration of the same. #, Major peak.

CAF, cafeoil. sh, shoulder in the UV spectrum.
